# Supplementary material for: Genome-wide transcriptional analysis of T cell activation reveals differential gene expression associated with psoriasis
Source: PubMed Central journal article supplement (PMC4046651; doi:10.1186/1471-2164-14-825), 2013-11-23

Network heatmap plot

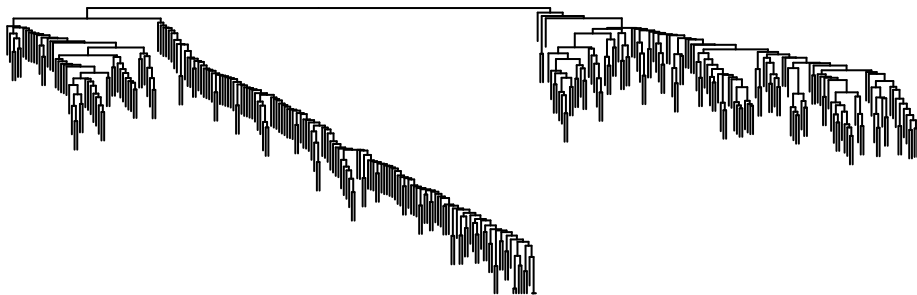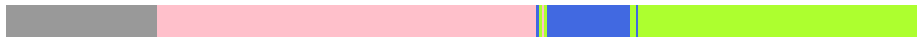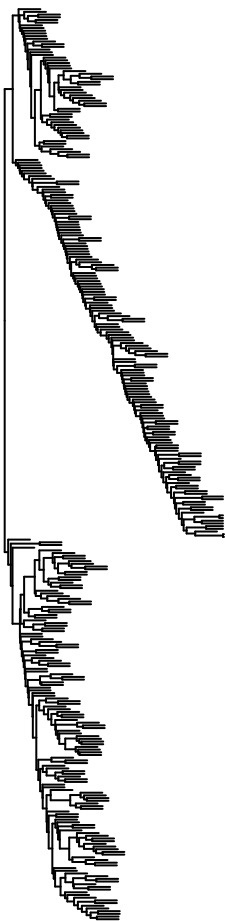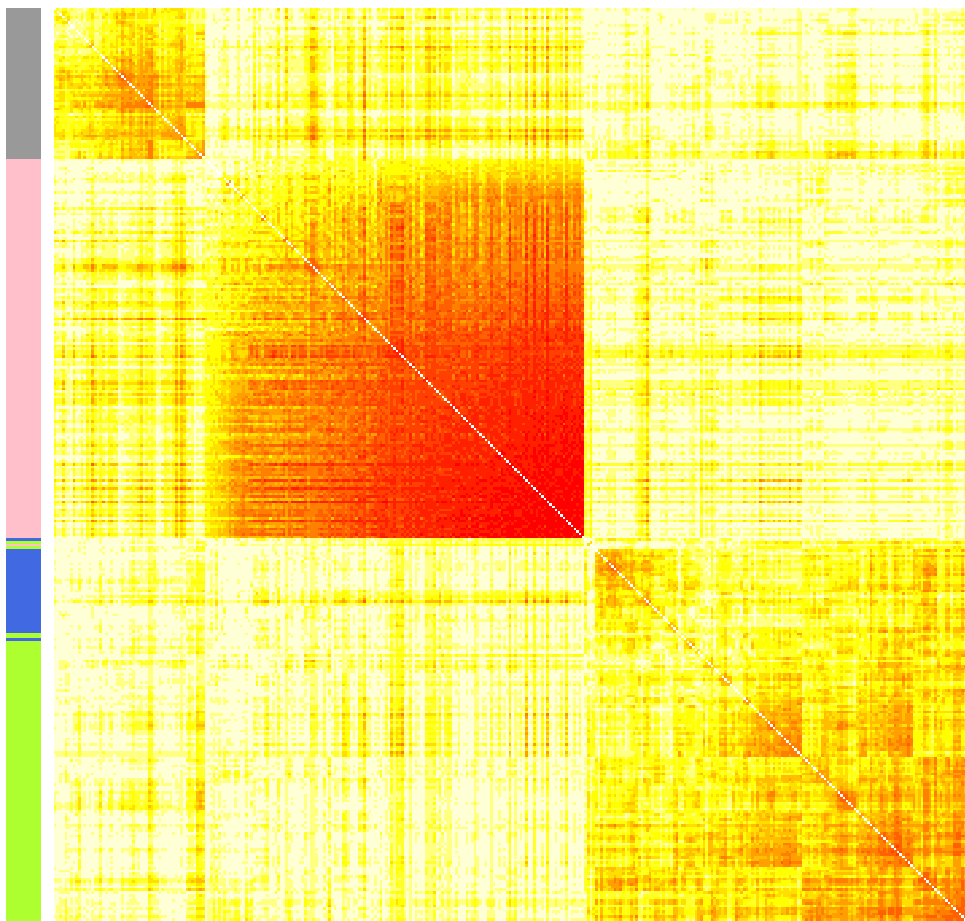

Supplement: 12864_2013_5528_MOESM5_ESM.pdf [file 12864_2013_5528_MOESM5_ESM.pdf]
