# Supplementary material for: Genome-wide transcriptional analysis of T cell activation reveals differential gene expression associated with psoriasis
Source: PubMed Central journal article supplement (PMC4046651; doi:10.1186/1471-2164-14-825), 2013-11-23

# Eigengene heatmap: Disease

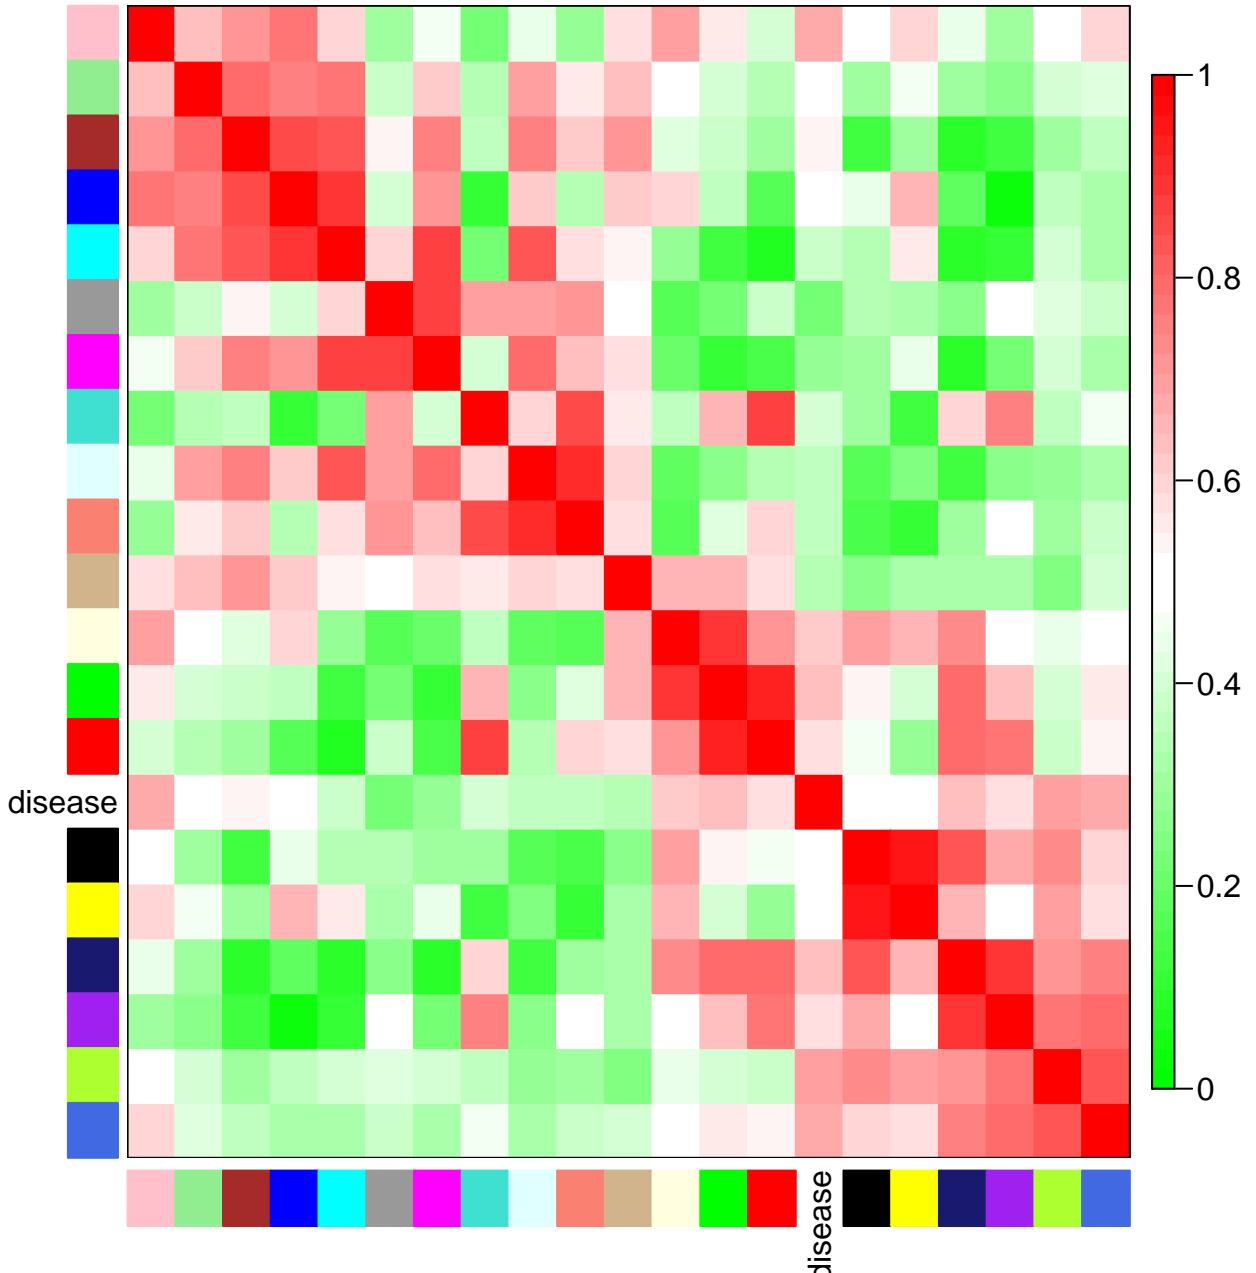

# Eigengene heatmap: Sex

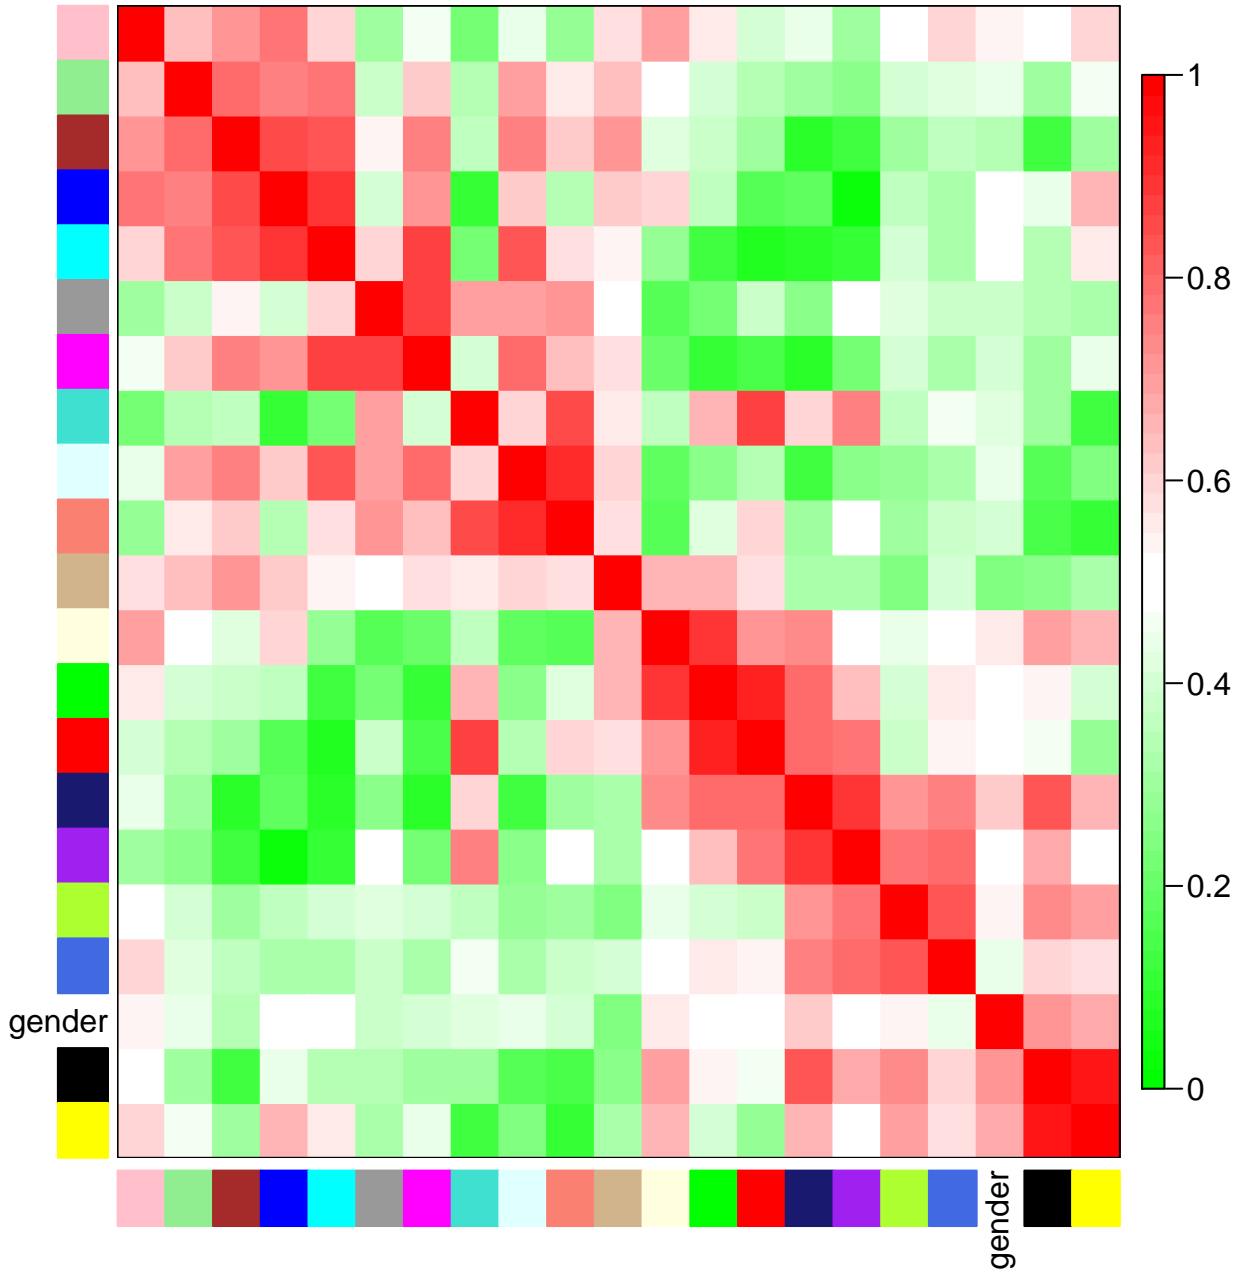

# Eigengene heatmap: PASI

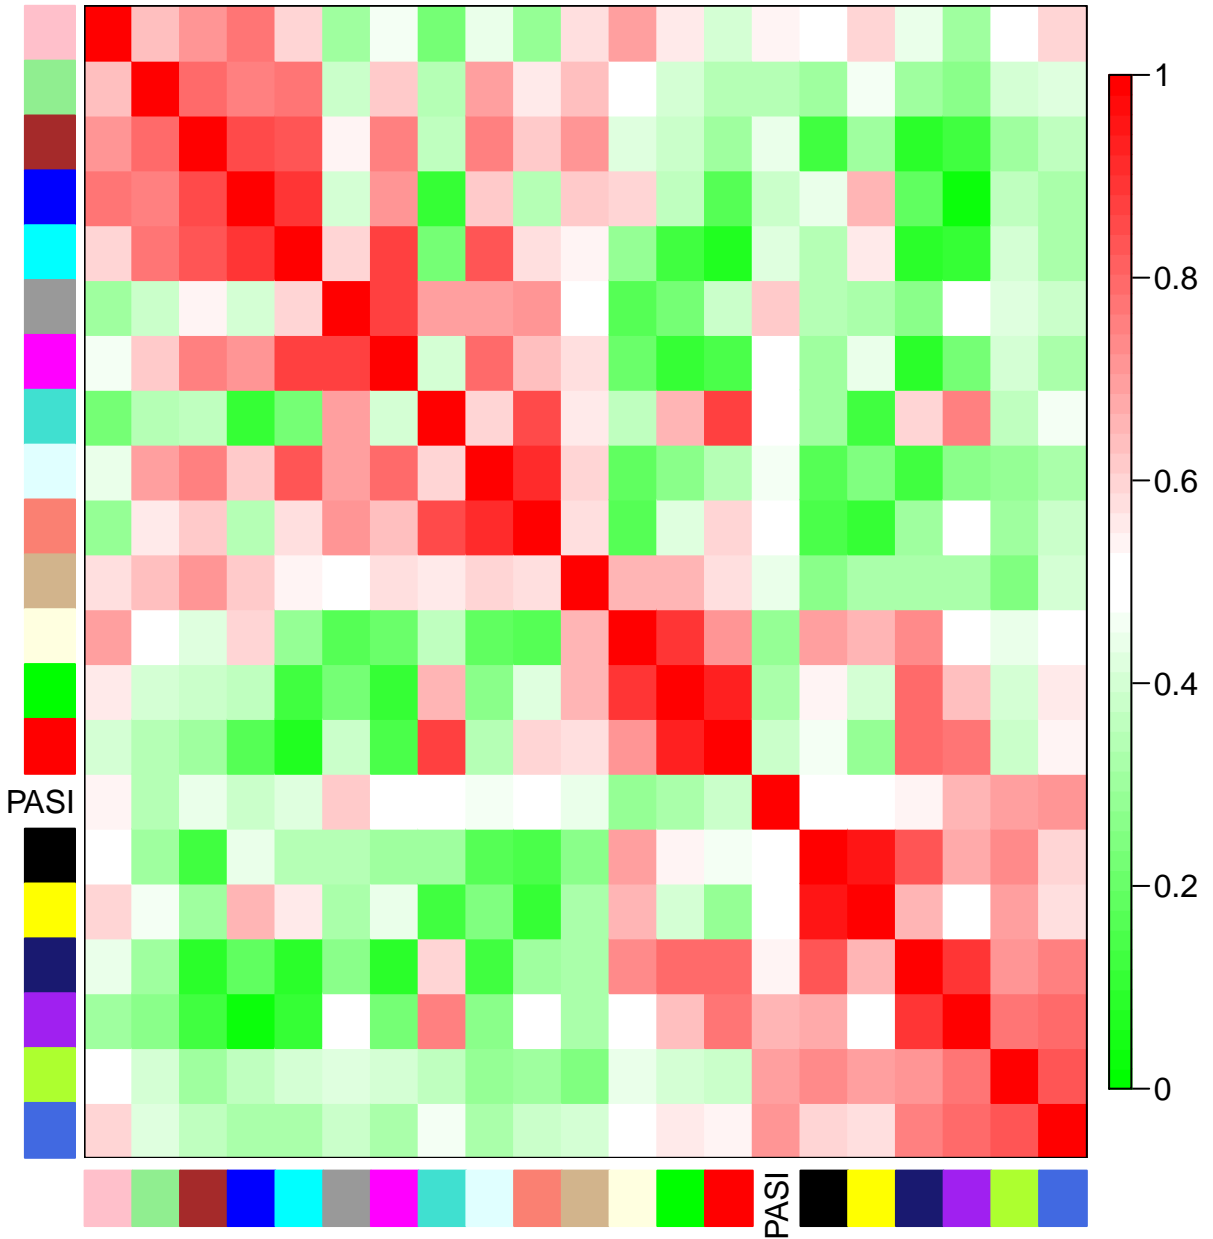

# Eigengene heatmap: Age

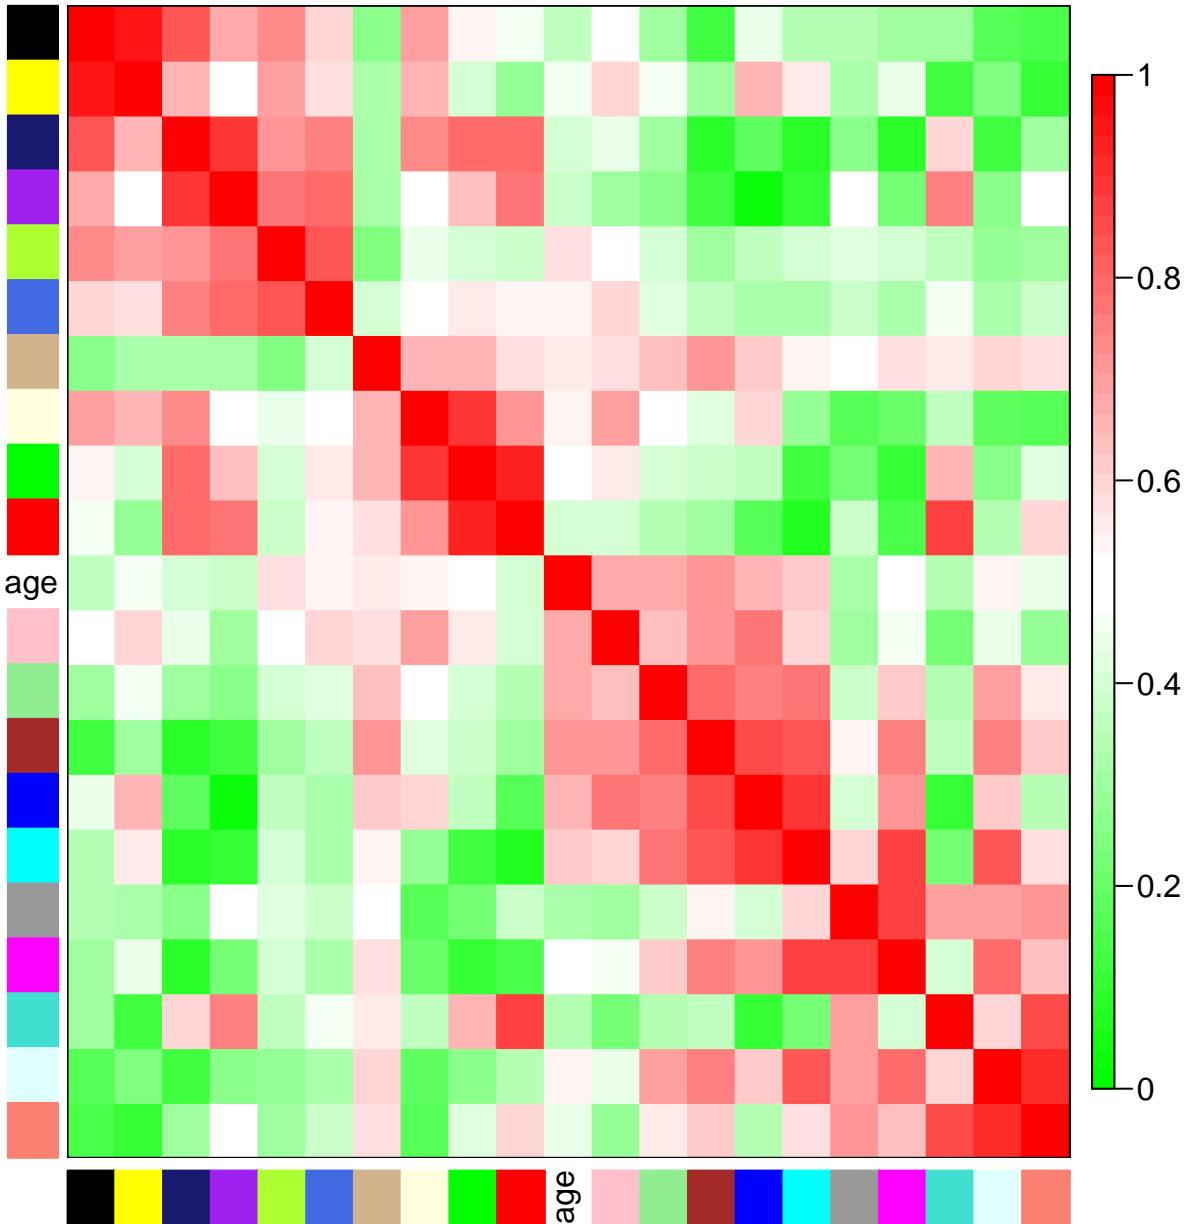

Supplement: 12864_2013_5528_MOESM6_ESM.pdf [file 12864_2013_5528_MOESM6_ESM.pdf]
